# Supplementary material for: Core-Shell Fe2O3@La1−xSrxFeO3−δ Material for Catalytic Oxidations: Coverage of Iron Oxide Core, Oxygen Storage Capacity and Reactivity of Surface Oxygens
Source: MDPI journal article supplement (doi:10.3390/ma14237355), 2021-11-30
Supplement: s1 [file s1]

## Supplementary Materials:

# Core-Shell $\text{Fe}_2\text{O}_3@\text{La}_{1-x}\text{Sr}_x\text{FeO}_{3-\delta}$ Material for Catalytic Oxidations: Coverage of Iron Oxide Core, Oxygen Storage Capacity and Reactivity of Surface Oxygens

### Supplementary Materials

Calculation of percent coverage of iron oxide core with LSF shell based on metals surface concentrations measured by XPS.

The calculations of %coverage of iron oxide core surface with the LSF shell in core-shell materials was done based on XPS data about the atomic surface concentration of metals (La, Fe, Sr). It was assumed that at the surface of  $\text{Fe}_2\text{O}_3$  core exist 100 FeO atoms (iron atoms belonging to the iron oxide surface) per 100 metal atoms. According to XPS data, at the LSF surface was detected 44 atoms  $\text{Fe}_\text{P}$  (iron atoms belonging to perovskite surface), at the surface of CS-3 material – 57 ( $\text{Fe}_\text{O}+\text{Fe}_\text{P}$ ) iron atoms and in CS-4 material – 61 ( $\text{Fe}_\text{O}+\text{Fe}_\text{P}$ ) atoms per 100 metal atoms and at the surface of CS-5 material – 46 ( $\text{Fe}_\text{O}+\text{Fe}_\text{P}$ ) atoms per 100 metal atoms. Assuming that the surface of core-shell materials represents a sum of surfaces belonging to pure (not LSF-covered) iron oxide and pure LSF, the calculations were done looking for the balance of iron atoms. If the share of Fe atoms representing pure core ( $\text{Fe}_\text{O}$ ) in core-shell material is  $x$  atoms per 100 atoms the amount of  $\text{Fe}_\text{P}$  atoms will be  $0.44 \cdot (100-x)$  per 100 atoms. The atomic balance equation:

$$1 \times (\text{Fe}_\text{O}) + 0.44 (100-x) (\text{Fe}_\text{P}) = \text{Fe}_\text{total} \quad (1)$$

where  $\text{Fe}_\text{total}$  – total amount of Fe atoms ( $\text{Fe}_\text{O}+\text{Fe}_\text{P}$ ) per 100 metal atoms detected at materials surface by XPS, where  $\text{Fe}_\text{total}$  – total amount of Fe atoms ( $\text{Fe}_\text{O}+\text{Fe}_\text{P}$ ) per 100 metal atoms detected at materials surface by XPS, thus %coverage =  $100 - x$ .

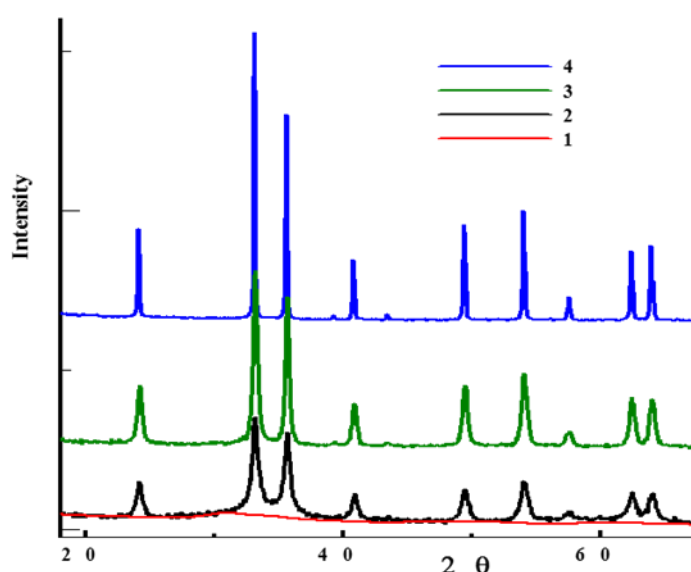

**Figure S1.** XRD patterns of pure iron oxide core. Fresh: (1) - hematite particles <4 nm, well crystallized hematite (2); after calcination at 450°C (3); after calcination at 700°C (4).

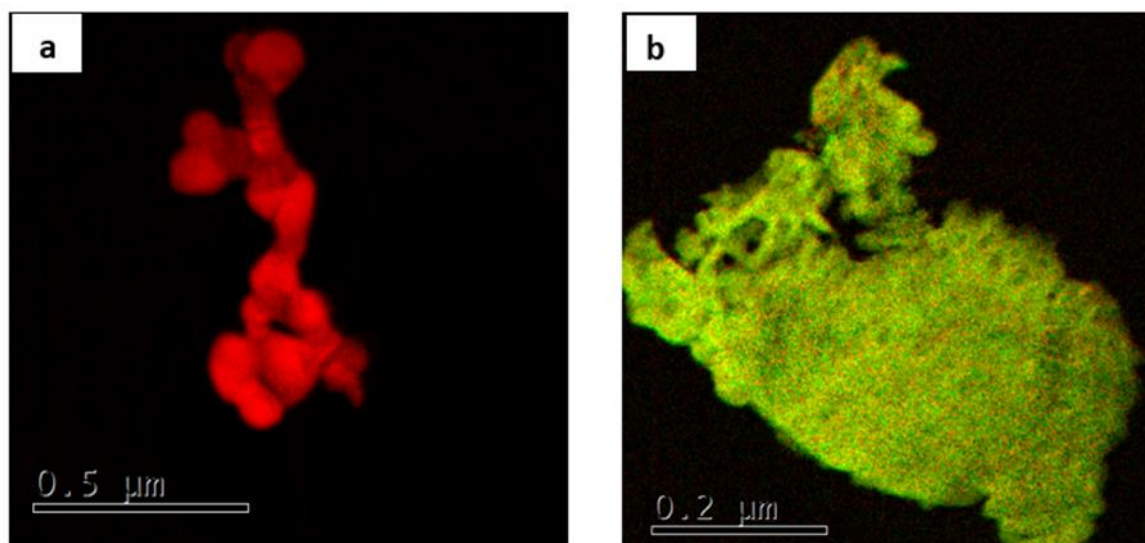

**Figure S2.** HRTEM-EELS images of pure  $\text{Fe}_2\text{O}_3$  (a) and LSF (b) materials.

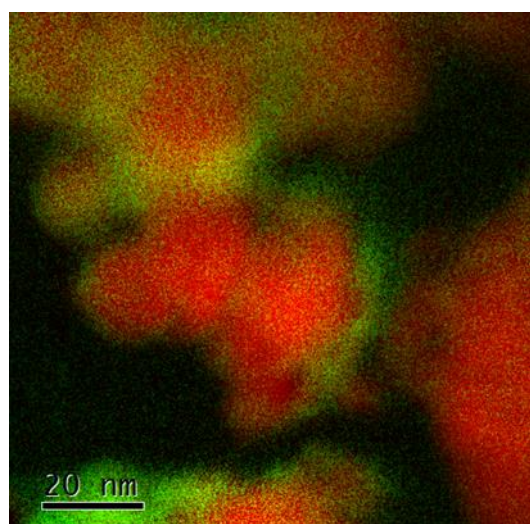

**Figure S3.** HRTEM-EELS image of core-shell material CS-1 recorded at high magnification. La - green, Fe - red.

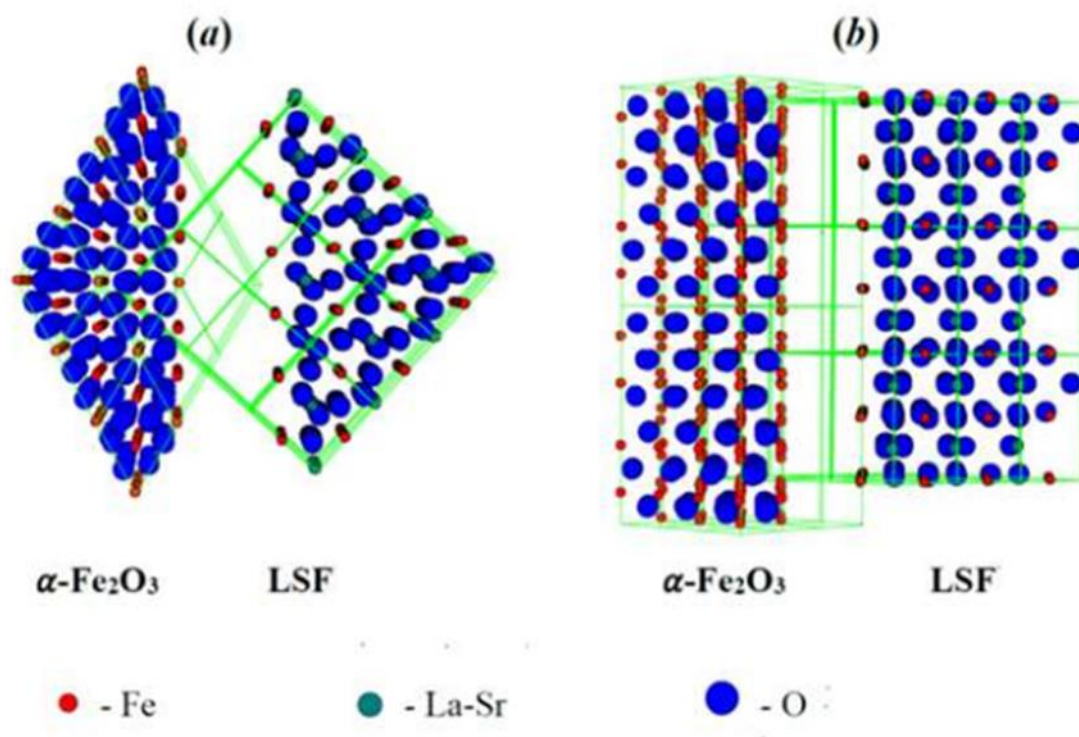

**Figure S4.** Atomic arrangements at the crystal planes (110) of  $\alpha\text{-Fe}_2\text{O}_3$  and LSF materials: (a) horizontal projection; (b) frontal projection.

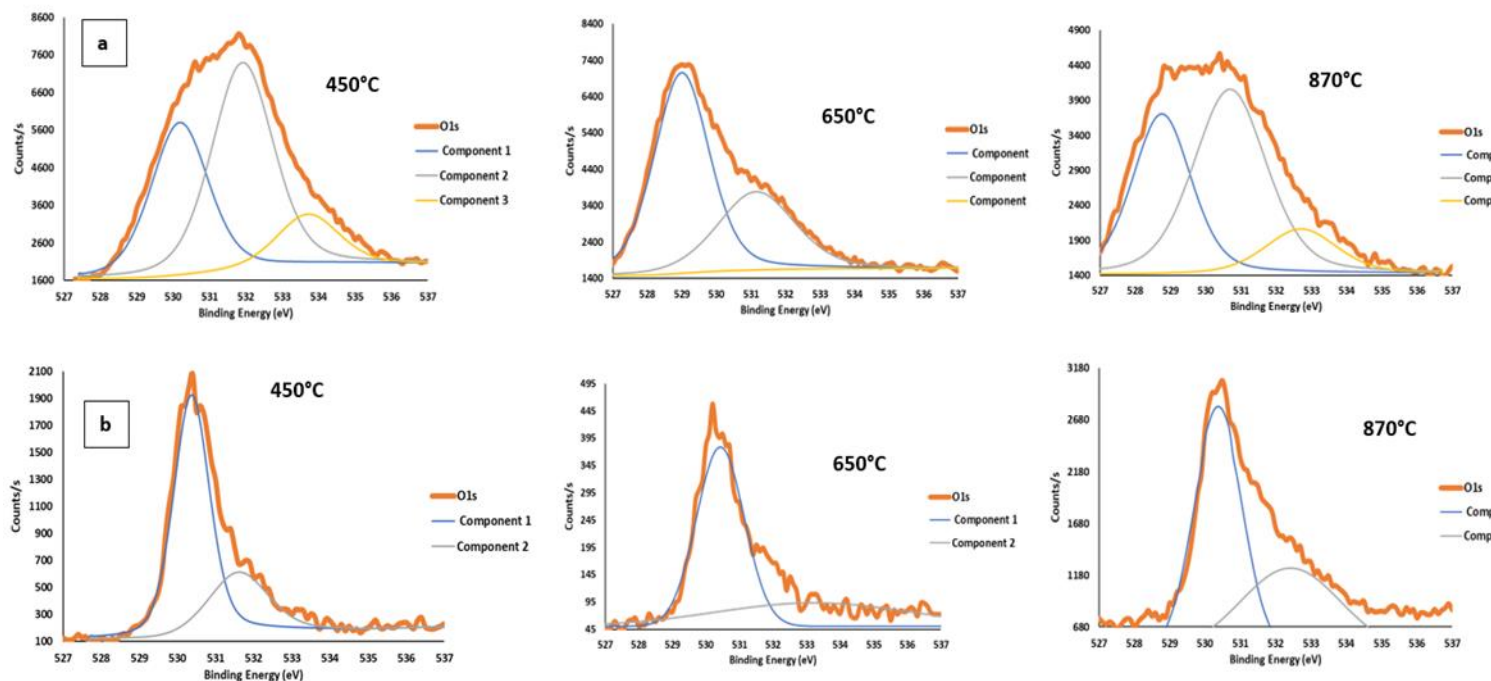

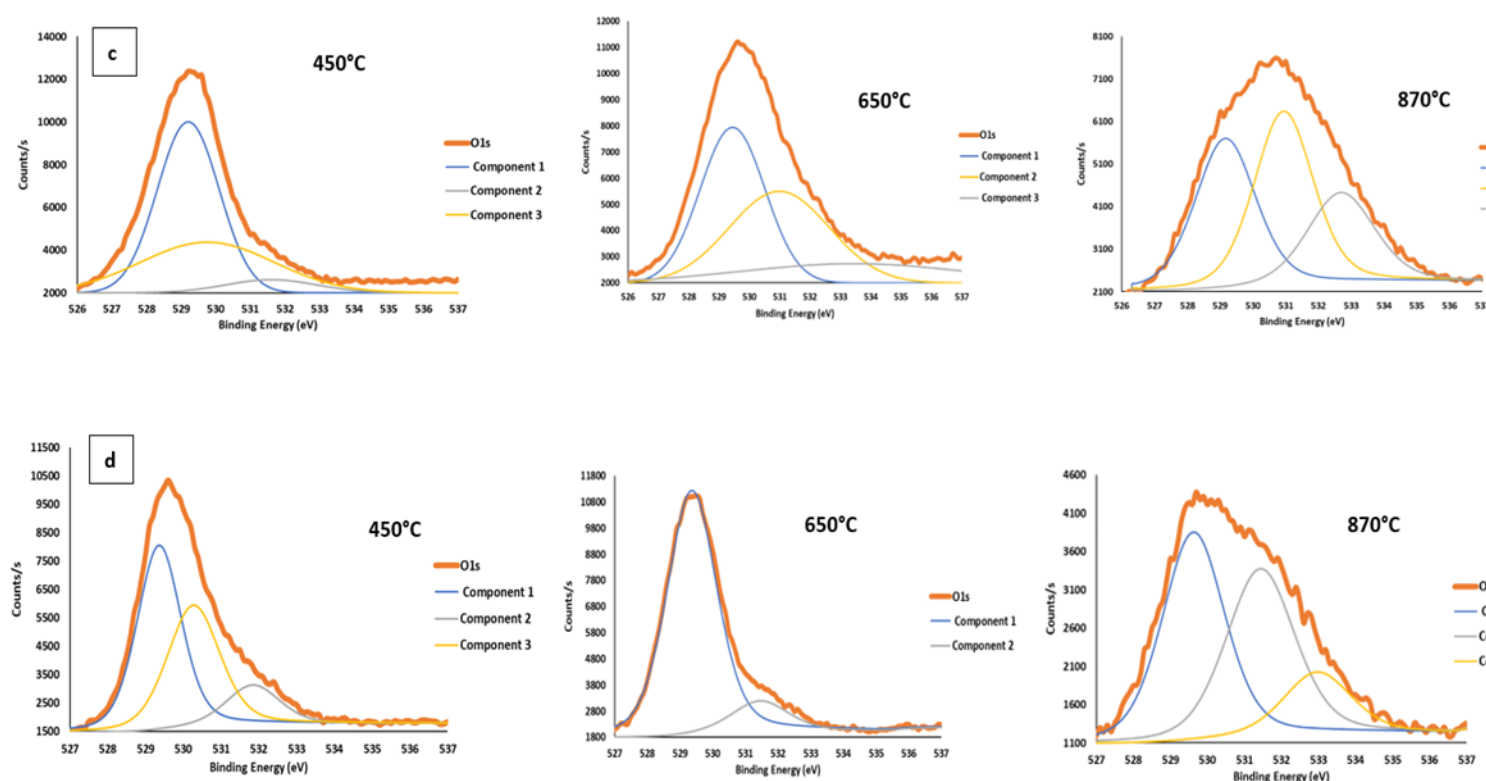

**Figure S5.** XPS spectra of O1s core recorded with materials after H<sub>2</sub>-TPR-experiments at 450 °C, 650 °C and 870 °C: (a) LSF; (b) Fe<sub>2</sub>O<sub>3</sub> (calcined at 700 °C); (c) CS-4; (d) CS-5.

**Table S1.** Preparation methods and properties of materials after calcination in air at 700 °C.

| Materials                                            | Preparation method                                                                                                                                                                                    |
|------------------------------------------------------|-------------------------------------------------------------------------------------------------------------------------------------------------------------------------------------------------------|
| <b>Fe<sub>2</sub>O<sub>3</sub></b>                   | Calcination at 700 °C                                                                                                                                                                                 |
| La <sub>0.8</sub> Sr <sub>0.2</sub> FeO <sub>3</sub> | Sol-gel synthesis, citric acid-glycine complexants                                                                                                                                                    |
| CS-1                                                 | Infiltration of aqueous solution of Sr-La-Fe salts and citric acid -glycine complexants to fresh not calcined Fe <sub>2</sub> O <sub>3</sub> powder, gelation drying, calcination                     |
| CS-2                                                 | Infiltration of aqueous solution of Sr-La-Fe salts and citric acid -ethylene glycol complexants to fresh not calcined Fe <sub>2</sub> O <sub>3</sub> powder, gelation drying, calcination             |
| CS-3                                                 | Infiltration of aqueous solution of Sr-La-Fe salts and citric acid – glycine complexants to fresh not calcined Fe <sub>2</sub> O <sub>3</sub> powder, gelation drying, calcination                    |
| CS-4                                                 | Infiltration of aqueous solution of Sr-La-Fe salts and glycine complexant to fresh not calcined Fe <sub>2</sub> O <sub>3</sub> powder, gelation drying, calcination                                   |
| CS-5                                                 | Infiltration of aqueous solution of Sr-La-Fe salts and citric acid complexant to fresh not calcined Fe <sub>2</sub> O <sub>3</sub> powder, gelation drying, calcination                               |
| CS-6                                                 | Infiltration of aqueous solution of Sr-La salts and citric acid – glycine complexants to fresh not calcined Fe <sub>2</sub> O <sub>3</sub> powder gelation drying, calcination                        |
| CS-7                                                 | Infiltration of citric acid – glycine complexants solution to fresh not calcined Fe <sub>2</sub> O <sub>3</sub> powder, drying, infiltration of Sr-La-Fe salts solution, gelation drying, calcination |
| CS-8                                                 | Infiltration of aqueous solution of Sr-La-Fe salts 50% excess of citric acid – glycine complexants to fresh not calcined Fe <sub>2</sub> O <sub>3</sub> powder, gelation drying, calcination          |
| CS-9                                                 | Infiltration of aqueous solution of Sr-La-Fe salts and citric acid complexant to fresh not calcined Fe <sub>2</sub> O <sub>3</sub> powder, gelation drying, calcination                               |

| Materials                                            | Phase composition (XRD, wt%)/crystals size (nm) |                                                   |                                                    | Texture parameters (N <sub>2</sub> -adsorption) |                                 |                           |
|------------------------------------------------------|-------------------------------------------------|---------------------------------------------------|----------------------------------------------------|-------------------------------------------------|---------------------------------|---------------------------|
|                                                      | LSF                                             | $\alpha$ -Fe <sub>2</sub> O <sub>3</sub> hematite | $\gamma$ -Fe <sub>2</sub> O <sub>3</sub> maghemite | Surface area, m <sup>2</sup> /g                 | Pore volume, cm <sup>3</sup> /g | Average pore diameter, nm |
| Fe <sub>2</sub> O <sub>3</sub>                       | --                                              | 100/50                                            | --                                                 | 8                                               | 0.06                            | 9.2                       |
| La <sub>0.8</sub> Sr <sub>0.2</sub> FeO <sub>3</sub> | 100/25                                          | --                                                | --                                                 | 17                                              | 0.003                           | 3                         |
| CS-1                                                 | 29/25                                           | 56/40                                             | 15/20                                              | 16                                              | 0.1                             | 13                        |
| CS-2                                                 | 28/45                                           | 71.5/>50                                          | --                                                 | 13                                              | 0.1                             | 23                        |
| CS-3                                                 | 60/30                                           | 40/45                                             | --                                                 | 11                                              | 0.1                             | 9                         |
| CS-4                                                 | 58/30                                           | 36/45                                             | 6/15                                               | 10                                              | 0.1                             | 10                        |
| CS-5                                                 | 60/22                                           | 29/45                                             | 11/20                                              | 20                                              | 0.2                             | 19                        |
| CS-6                                                 | 57/45                                           | 43/45                                             | --                                                 | 14                                              | 0.1                             | 20                        |
| CS-7                                                 | 60/30                                           | 28/50                                             | 12/20                                              | 8                                               | 0.1                             | 7                         |
| CS-8                                                 | 61/25                                           | 13/45                                             | 26/25                                              | 12                                              | 0.1                             | 8                         |
| CS-9                                                 | 50/25                                           | 40/45                                             | 10/40                                              | 18                                              | 0.1                             | 15                        |

**Table S2.** The peak width measured in deconvoluted XPS spectra of as-prepared materials presented in Figure 11.

| Materials                      | Lattice oxygen |            | Defect-affected oxygen |            | Surface oxygen |            | Carbonate and Organics oxygen |            | Oxygen in hydroxyl groups |            |
|--------------------------------|----------------|------------|------------------------|------------|----------------|------------|-------------------------------|------------|---------------------------|------------|
|                                | B.E., eV       | Width., eV | B.E., eV               | Width., eV | B.E., eV       | Width., eV | B.E., eV                      | Width., eV | B.E., eV                  | Width., eV |
| Fe <sub>2</sub> O <sub>3</sub> | 529.6          | 1.0        | -----                  | -----      | 530.7          | 1.3        | ----                          | -----      | 532.8                     | 1.4        |
| LSF                            | 528.9          | 1.1        | 529.9                  | 1.2        | 530.5          | 1.3        | 531.3                         | 1.4        | 532.2                     | 1.2        |
| Core-shell CS-4                | 529.0          | 1.1        | 529.8                  | 1.1        | 530.6          | 1.2        | 531.4                         | 1.1        | 532.6                     | 1.4        |
| Core-shell CS-5                | 529.0          | 1.3        | 529.8                  | 1.3        | 530.5          | 1.2        | 531.1                         | 1.4        | 532.3                     | 1.5        |

**Table S3.** Carbon species detected by XPS in as-prepared materials.

| Materials                      | C1s: C-C/C-H |       |            | C1s: C-O-C |       |            | C1s: O-C=O |       |            |
|--------------------------------|--------------|-------|------------|------------|-------|------------|------------|-------|------------|
|                                | B.E., eV     | % at. | Width., eV | B.E., eV   | % at. | Width., eV | B.E., eV   | % at. | Width., eV |
| Fe <sub>2</sub> O <sub>3</sub> | 284.8        | 92.3  | 1.7        | 285.8      | 3.0   | 1.8        | 288.9      | 4.7   | 1.8        |
| LSF                            | 284.8        | 66.0  | 1.4        | 286.4      | 9.5   | 0.9        | 289.1      | 24.6  | 1.9        |
| Core-shell CS-4                | 284.8        | 75.7  | 1.6        | 286.3      | 11.0  | 1.5        | 289.2      | 13.3  | 1.5        |
| Core-shell CS-5                | 284.8        | 67.0  | 1.6        | 286.1      | 11.6  | 1.5        | 289.2      | 14.3  | 1.9        |



**Table S4.** The peak width measured in deconvoluted XPS spectra of materials recorded after H<sub>2</sub>-TPR testing and presented in Figure S4.

| Materials                                | Lattice oxygen |            | Defect-affected oxygen |            | Surface oxygen |            | Carbonate and organics oxygen |            | Oxygen in hydroxyl groups |            |
|------------------------------------------|----------------|------------|------------------------|------------|----------------|------------|-------------------------------|------------|---------------------------|------------|
|                                          | B.E., eV       | Width., eV | B.E., eV               | Width., eV | B.E., eV       | Width., eV | B.E., eV                      | Width., eV | B.E., eV                  | Width., eV |
| <b>LSF fresh</b>                         | 528.9          | 1.1        | 529.9                  | 1.2        | 530.5          | 1.3        | 531.3                         | 1.4        | 532.2                     | 1.2        |
| H <sub>2</sub> -TPR 450°C                | -----          | -----      | 530.2                  | 1.9        | -----          | -----      | 531.9                         | 2.0        | 533.7                     | 2.0        |
| H <sub>2</sub> -TPR 650°C                | -----          | -----      | 529.5                  | 1.9        | -----          | -----      | 531.7                         | 2.0        | 532.7                     | 2.0        |
| H <sub>2</sub> -TPR 870°C                | 528.7          | 2.0        | -----                  | -----      | -----          | -----      | 531.1                         | 2.6        | 533.4                     | 2.0        |
| <b>CS-4 fresh</b>                        | 529.0          | 1.1        | 529.8                  | 1.1        | 530.6          | 1.2        | 531.4                         | 1.1        | 532.6                     | 1.4        |
| H <sub>2</sub> -TPR 450°C                | 528.3          | 2.1        | 529.6                  | 2.3        | -----          | -----      | 531.0                         | 3.0        | -----                     | -----      |
| H <sub>2</sub> -TPR 650°C                | 528.9          | 2.4        | 530.1                  | 3.5        | -----          | -----      | 531.6                         | 4.3        | -----                     | -----      |
| H <sub>2</sub> -TPR 870°C                | 529.2          | 2.2        | -----                  | -----      | -----          | -----      | 531.0                         | 2.1        | 532.7                     | 2.4        |
| <b>CS-5 fresh</b>                        | 529.0          | 1.3        | 529.8                  | 1.3        | 530.5          | 1.2        | 531.1                         | 1.4        | 532.3                     | 1.5        |
| H <sub>2</sub> -TPR 450°C                | -----          | -----      | 529.4                  | 1.4        | 530.3          | 1.7        | 531.8                         | 1.7        | -----                     | -----      |
| H <sub>2</sub> -TPR 650°C                | -----          | -----      | 529.4                  | 1.8        | -----          | -----      | 531.5                         | 2.0        | -----                     | -----      |
| H <sub>2</sub> -TPR 870°C                | -----          | -----      | 529.6                  | 2.0        | -----          | -----      | 531.4                         | 2.2        | 533.0                     | 2.2        |
| <b>Fe<sub>2</sub>O<sub>3</sub> fresh</b> | 529.6          | 1.0        | -----                  | -----      | 530.7          | 1.3        | -----                         | -----      | 532.8                     | 1.4        |
| H <sub>2</sub> -TPR 450°C                | -----          | -----      | -----                  | -----      | 530.4          | 1.1        | -----                         | -----      | 532.6                     | 1.8        |
| H <sub>2</sub> -TPR 650°C                | -----          | -----      | -----                  | -----      | 530.2          | 1.7        | -----                         | -----      | 532.6                     | 3.4        |
| H <sub>2</sub> -TPR 870°C                | -----          | -----      | -----                  | -----      | 530.3          | 1.8        | -----                         | -----      | 532.7                     | 4.0        |

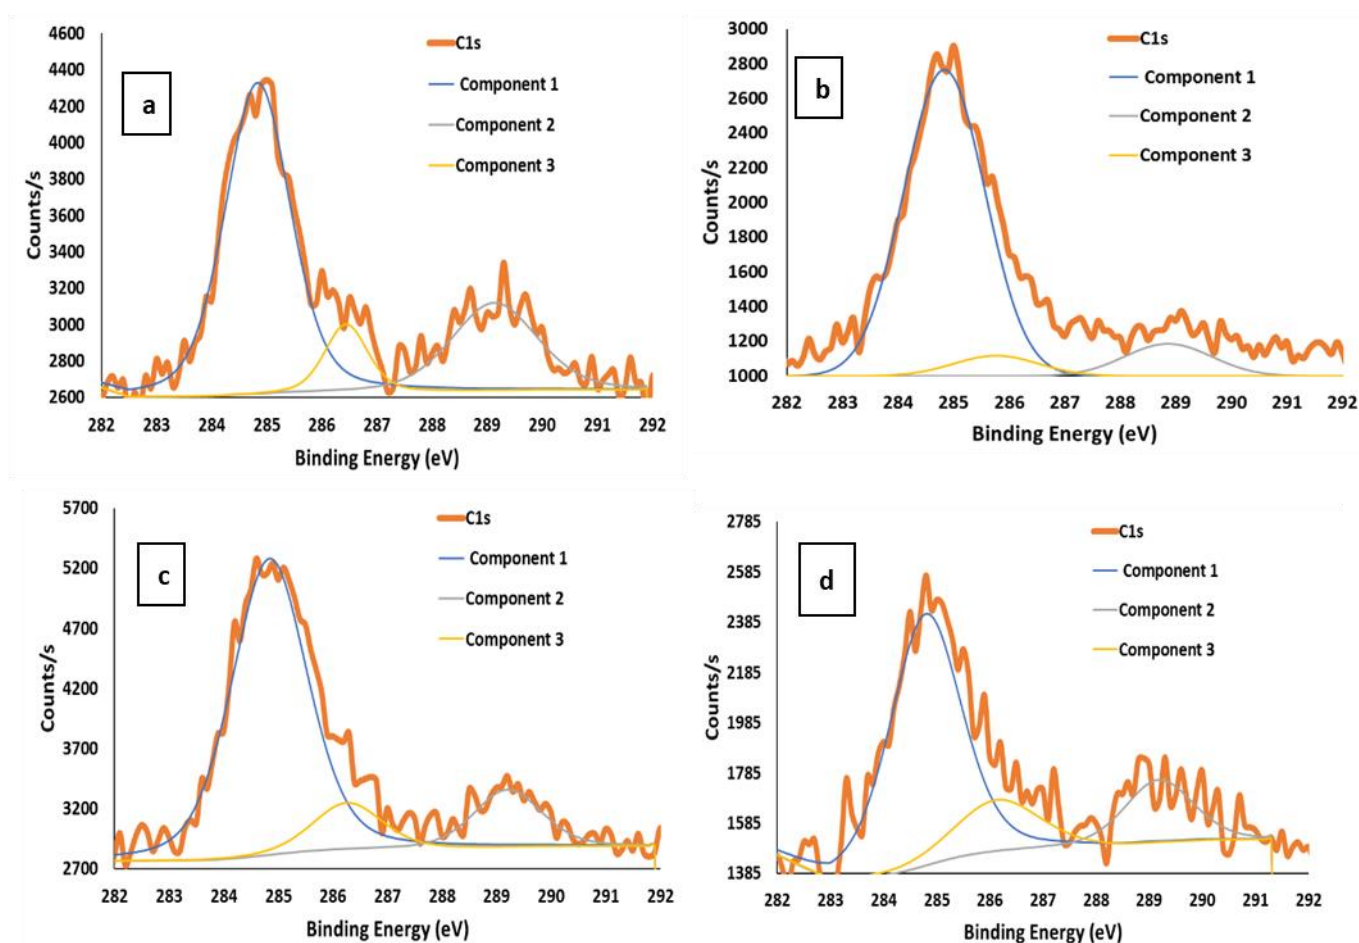

**Figure S6.** XPS spectra of C1s core: (a) LSF-perovskite; (b) Fe<sub>2</sub>O<sub>3</sub> calcined at 700°C and Fe<sub>2</sub>O<sub>3</sub>@LSF core-shell materials - (c) CS-4 and (d) CS-5.

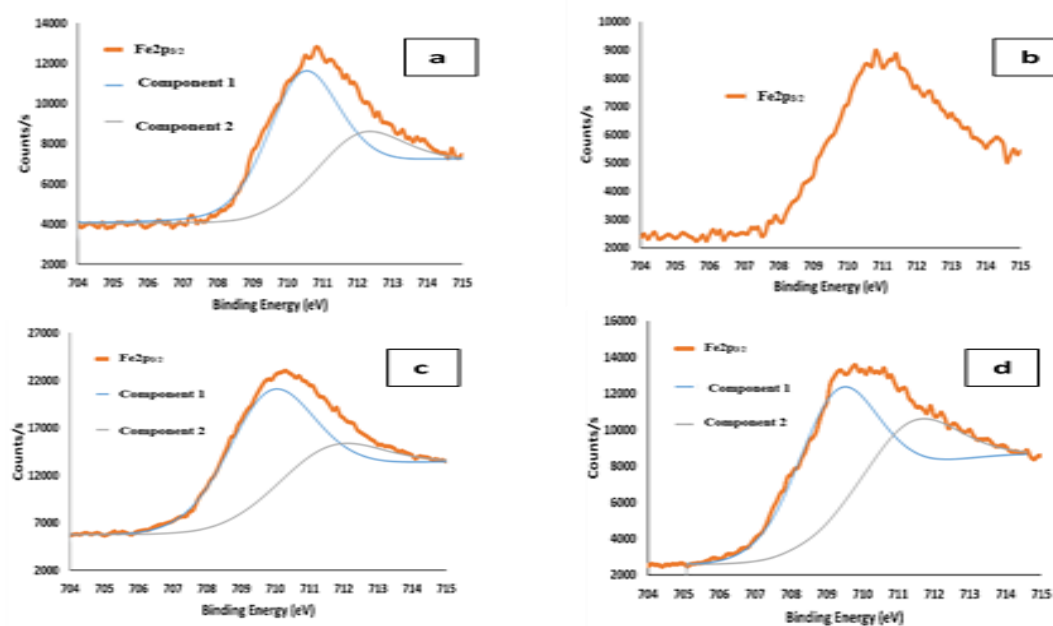

**Figure S7.** XPS spectra of Fe2p<sub>3/2</sub> core: (a) LSF-perovskite; (b) Fe<sub>2</sub>O<sub>3</sub> calcined at 700°C and Fe<sub>2</sub>O<sub>3</sub>@LSF core-shell materials - (c) CS-4 and (d) CS-5.

**Table S5.** Components of XPS spectra of Fe2p<sub>3/2</sub> core recorded with as-prepared materials.

| Materials                      | Fe2p <sub>3/2</sub> |       | Fe2p <sub>3/2</sub> |       |
|--------------------------------|---------------------|-------|---------------------|-------|
|                                | B.E., eV            | % at. | B.E., eV            | % at. |
| Fe <sub>2</sub> O <sub>3</sub> | 711.3               | 100   | -                   | -     |
| LSF                            | 710.4               | 73.3  | 712.1               | 26.7  |
| Core-shell CS-4                | 710.7               | 78.2  | 712.1               | 21.8  |
| Core-shell CS-5                | 710.6               | 66.1  | 712.2               | 33.9  |
